# Supplementary material for: Rough Ni@MoN corals for the hydrogen evolution reaction in acidic and alkaline media
Source: Royal Society of Chemistry journal article supplement (doi:10.1039/d3nj01497e), 2023-01-01
Supplement: d3nj01497e1.pdf [file d3nj01497e1.pdf]

# Electronic Supplementary Information for

## Rough Ni@MoN coral for the hydrogen evolution reaction in acidic and alkaline media

Yu Zhang,<sup>a</sup> Baiqing Zhang,<sup>a</sup> Xiangcun Liu,<sup>a</sup> Zhuoxun Yin,<sup>\*,a,b</sup> Xinzhi Ma,<sup>\*,c</sup> Yang Zhou,<sup>\*,d</sup> Wei Chen,<sup>a</sup> Jinlong Li<sup>a,b</sup> and Lingling Xu<sup>c</sup>

*a College of Chemistry and Chemical Engineering, Qiqihar University, Qiqihar 161006, China. E-mail: [yzx@qqhru.edu.cn](mailto:yzx@qqhru.edu.cn);*

*b Key Laboratory of Fine Chemicals of College of Heilongjiang Province, Qiqihar University, Qiqihar 161006, China;*

*c Key Laboratory for Photonic and Electronic Bandgap Materials, Ministry of Education and School of Physics and Electronic Engineering, Harbin Normal University, Harbin 150025, China. E-mail: [maxz@hrbnu.edu.cn](mailto:maxz@hrbnu.edu.cn);*

*d College of Science, Qiqihar University, Qiqihar 161006, China. E-mail: [373133430@qq.com](mailto:373133430@qq.com);*

<sup>✉</sup> Corresponding author.

E-mail addresses: [yzx@qqhru.edu.cn](mailto:yzx@qqhru.edu.cn)

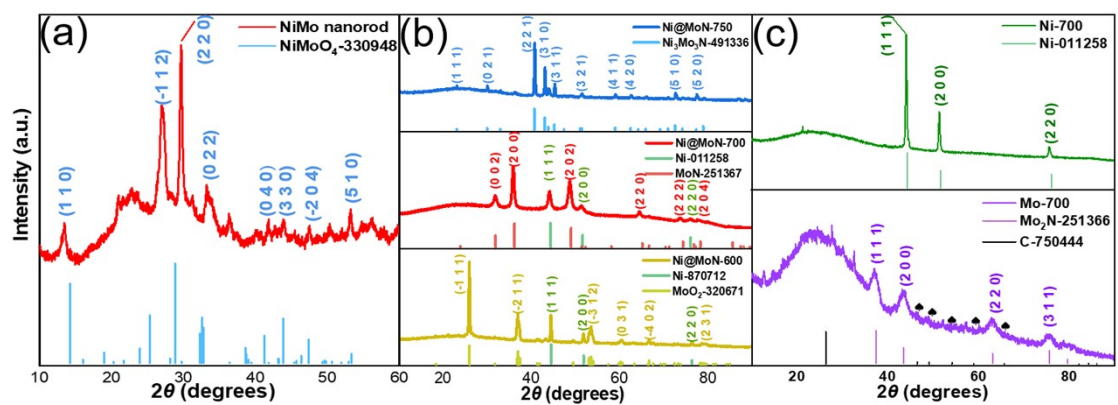

**Fig. S1.** XRD patterns of (a) NiMo nanorod, (b) Ni@MoN -650/700/750, (c) Ni-700 and Mo-700.

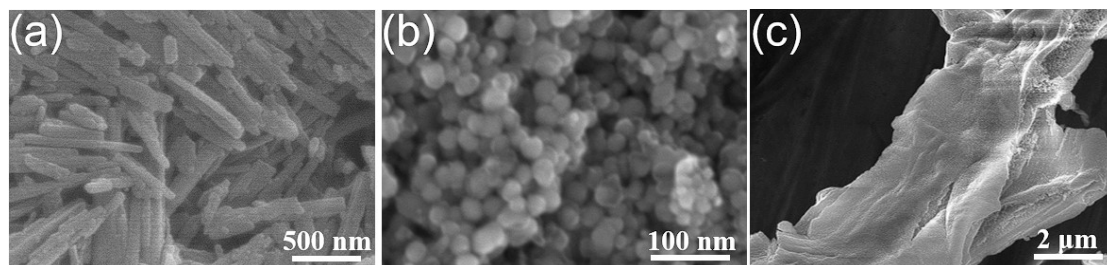

**Fig. S2.** SEM images of (a) NiMoO<sub>4</sub> nanorod, (b) Ni -700, (c) Mo-700.

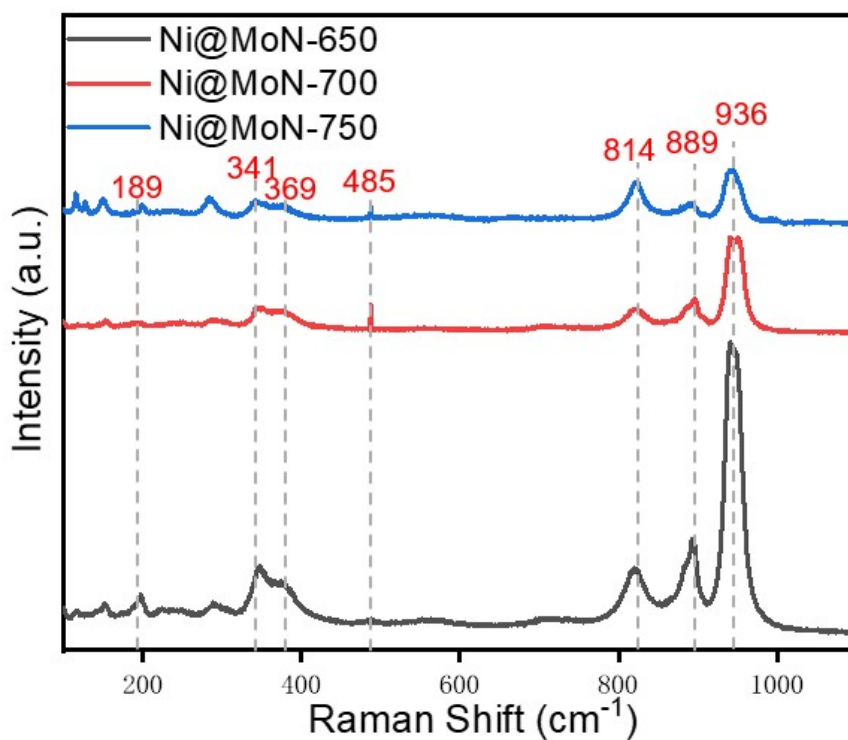

**Fig. S3.** Raman of Ni@MoN-650/700/750.

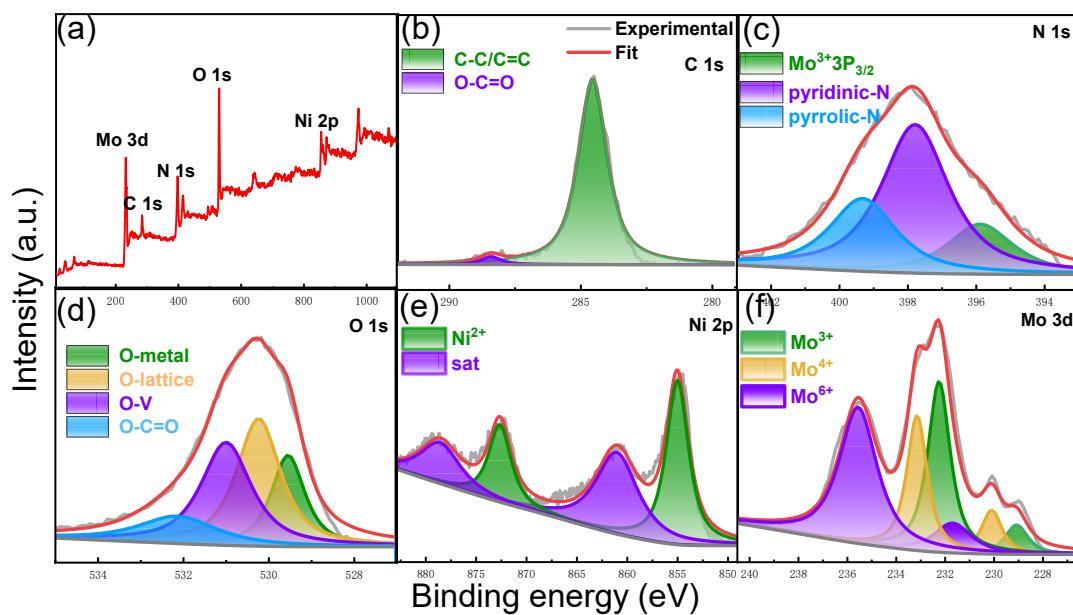

**Fig. S4.** XPS spectra of the Ni@MoN-650 catalysts: (a) survey, (b) C 1s, (c) N 1s, (d) O 1s, (e) Ni 2p and (f) Mo 3d.

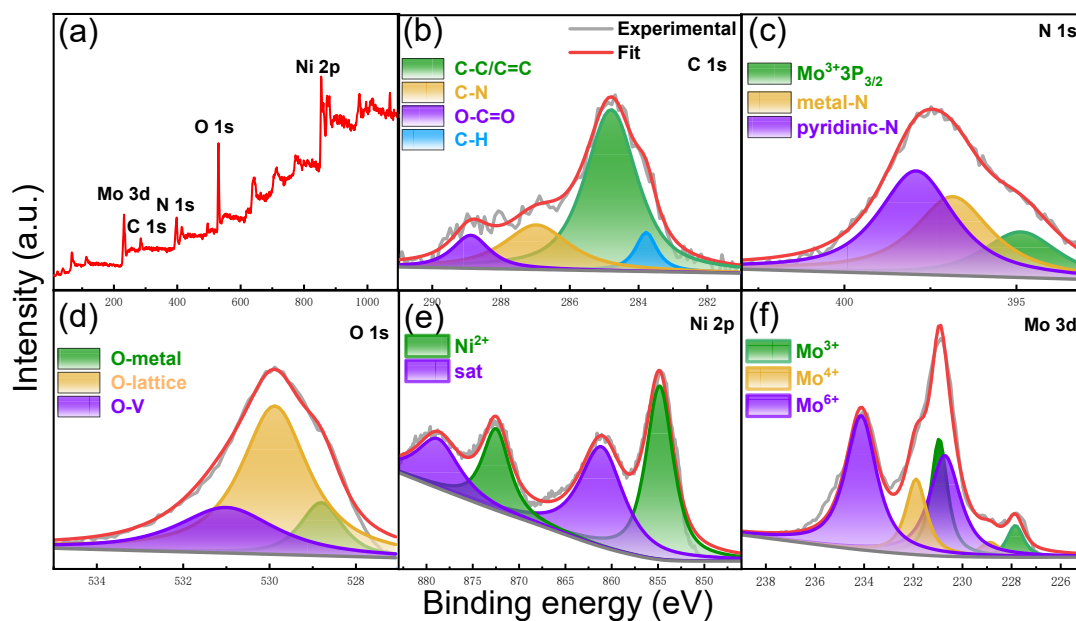

**Fig. S5.** XPS spectra of the Ni@MoN-750 catalysts: (a) survey, (b) C 1s, (c) N 1s, (d) O 1s, (e) Ni 2p and (f) Mo 3d.

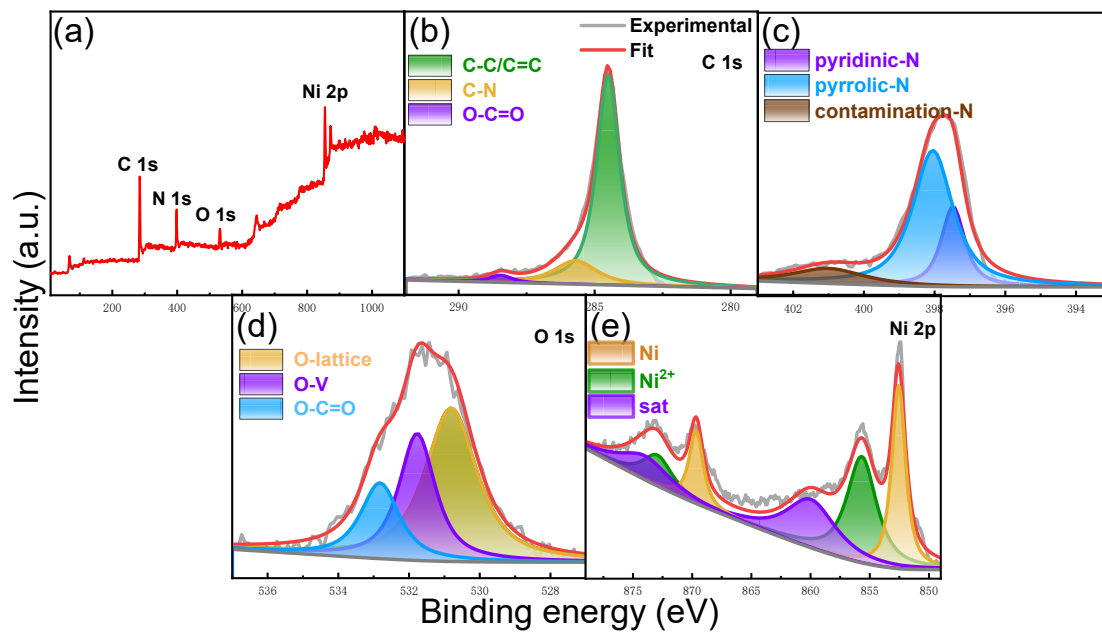

**Fig. S6.** XPS spectra of the Ni-700 catalysts: (a) survey, (b) C 1s, (c) N 1s, (d) O 1s and (e) Ni 2p.

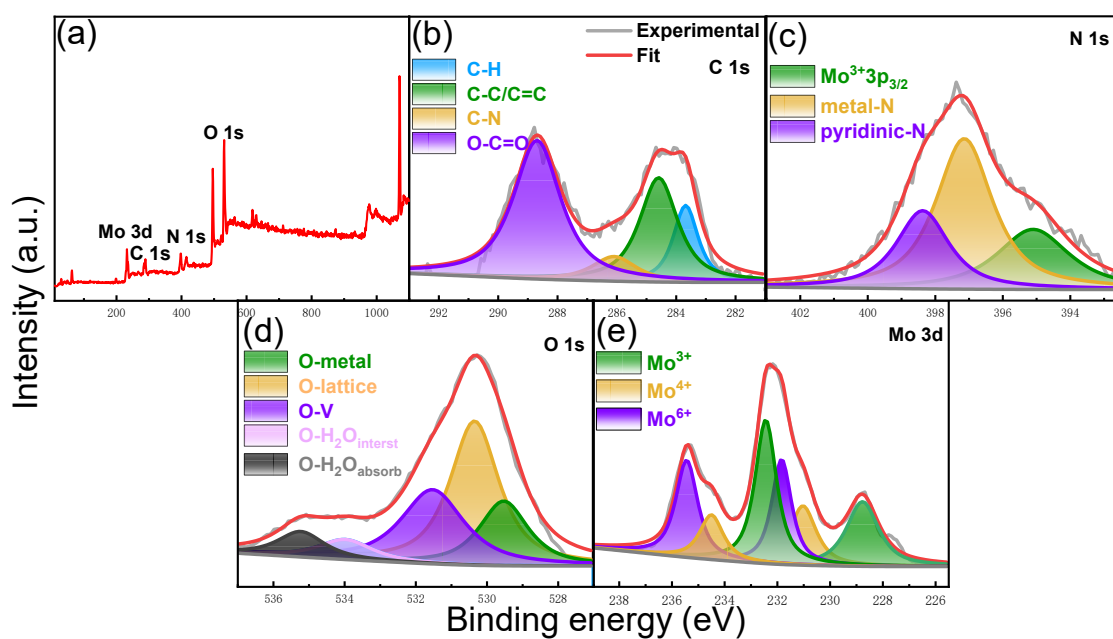

**Fig. S7.** XPS spectra of the Mo-700 catalysts: (a) survey, (b) C 1s, (c) N 1s, (d) O 1s and (e) Mo 3d.

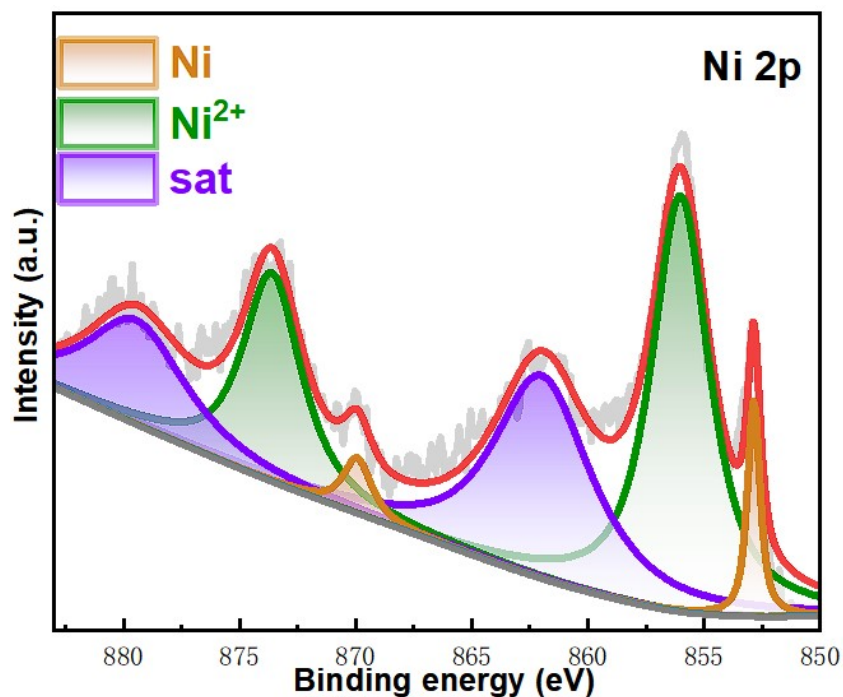

**Fig. S8.** XPS of Ni@MoN-700 after argon plasma etching , Ni 2p.

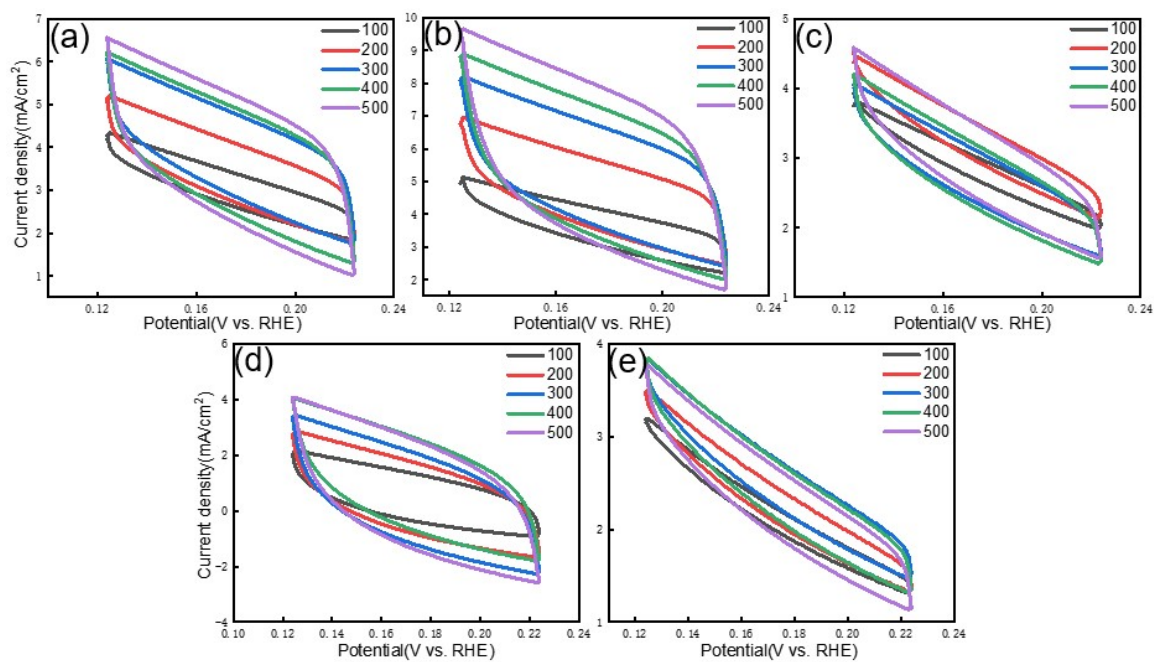

**Fig. S9.** (a) CV curves of Ni@MoN-650 electrode, (b) CV curves of Ni@MoN-700 electrode, (c) CV curves of Ni@MoN-750 electrode, (d) CV curves of Ni-700 electrode, (e) CV curves of Mo-700 electrode, in 1 M KOH.

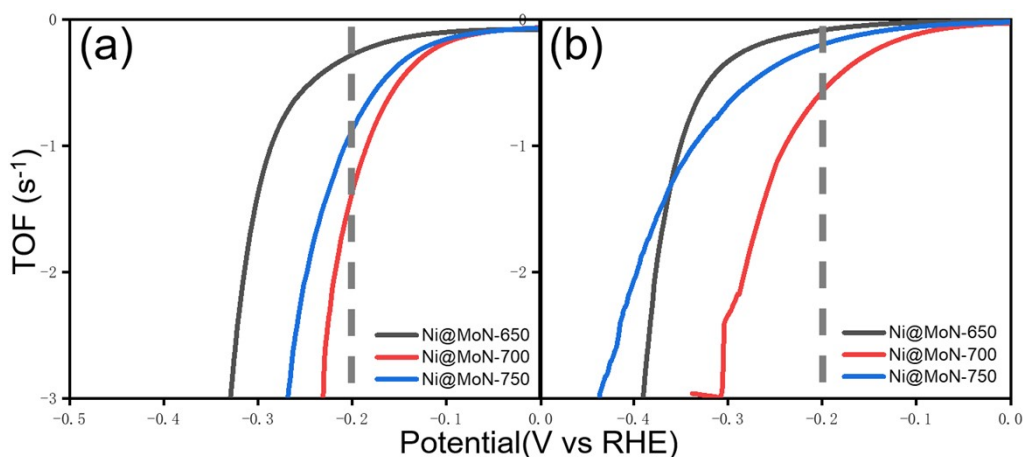

**Fig. S10.** (a) The HER-TOFs of the Ni@MoN-650/700/750 in 1 M KOH solution (b) The HER-TOFs of the Ni@MoN-650/700/750 in 0.5 M  $\text{H}_2\text{SO}_4$  solution.

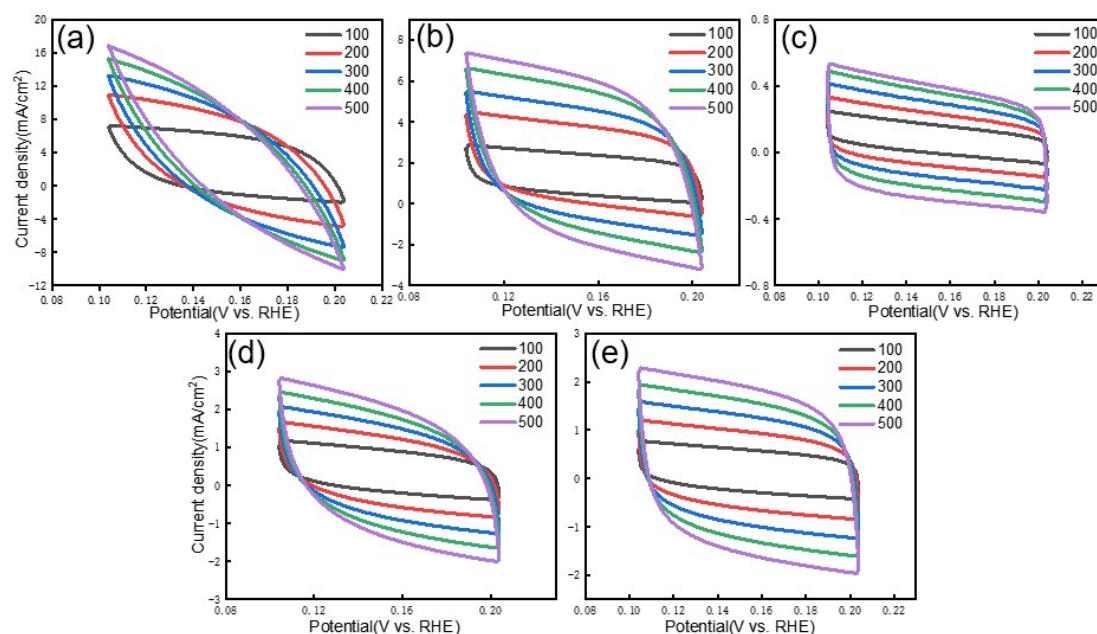

**Fig. S11.** (a) CV curves of Ni@MoN-650 electrode, (b) CV curves of Ni@MoN-700 electrode, (c) CV curves of Ni@MoN-750 electrode, (d) CV curves of Ni-700 electrode, (e) CV curves of Mo-700 electrode, in 0.5 M  $\text{H}_2\text{SO}_4$ .

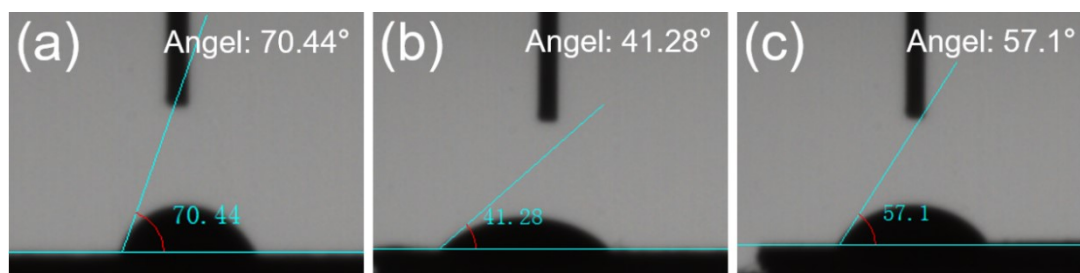

**Fig. S12.** Contact angles of (a) Ni@MoN-650, (b) Ni@MoN-700 and (c) Ni@MoN-750.

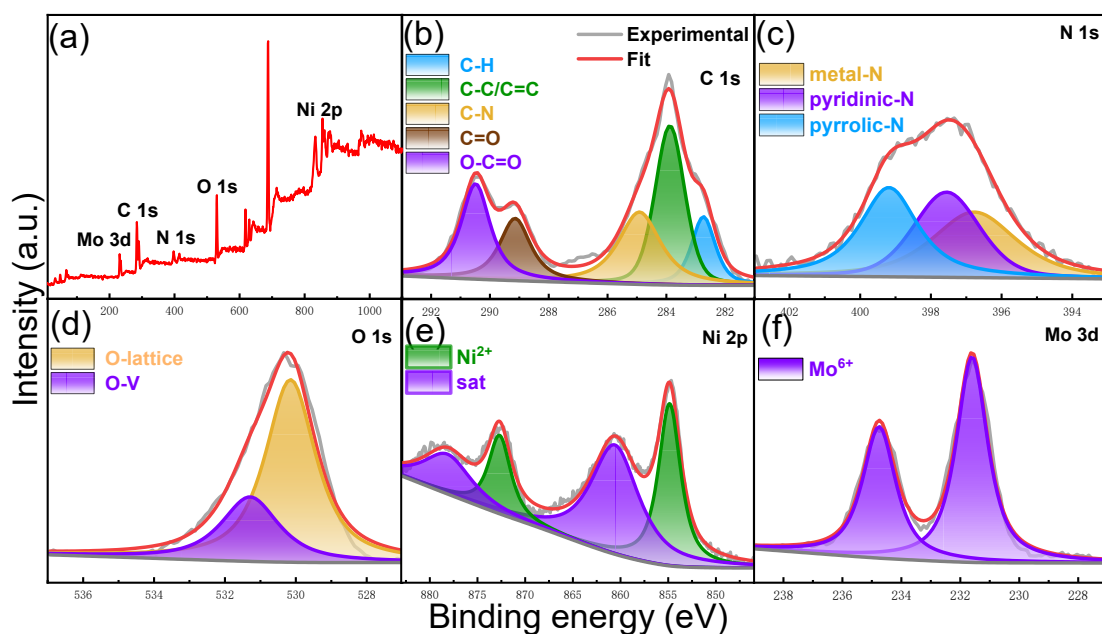

**Fig. S13.** XPS spectra of the Ni@MoN-700 catalysts after long-term electrolysis in 1M KOH: (a) survey, (b) C 1s, (c) N 1s, (d) O 1s, (e) Ni 2p and (f) Mo 3d.

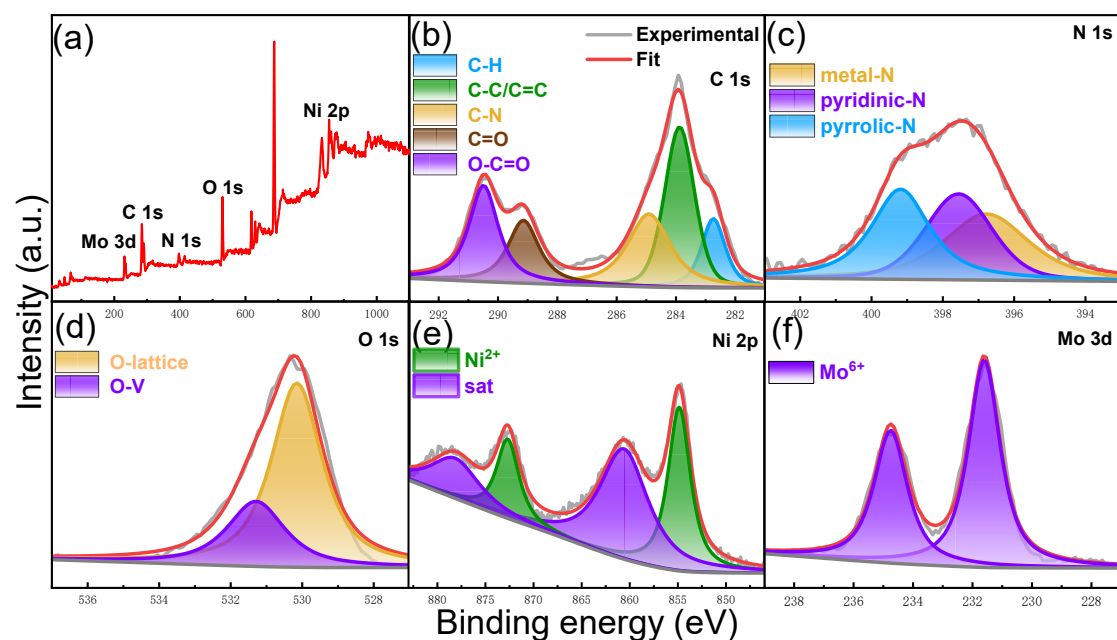

**Fig. S14.** XPS spectra of the Ni@MoN-700 catalysts after long-term electrolysis in 0.5 M H<sub>2</sub>SO<sub>4</sub>: (a) survey, (b) C 1s, (c) N 1s, (d) O 1s, (e) Ni 2p and (f) Mo 3d.

**Table S1.** The concentration of oxygen vacancies for different samples as calculated from the O 1s XPS spectra.

| Catalyst                              | $S_{O-v}/S_{total\ other\ peak}$ |
|---------------------------------------|----------------------------------|
| Ni@MoN-650                            | 0.43                             |
| Ni@MoN-700                            | 0.54                             |
| Ni@MoN-750                            | 0.35                             |
| Ni -700                               | 0.43                             |
| Mo-700                                | 0.37                             |
| KOH-after                             | 0.41                             |
| H <sub>2</sub> SO <sub>4</sub> -after | 0.16                             |

**Table S2.** Comparison of the R<sub>CT</sub> values of the prepared materials .

| Sample     | RCT (Ohm)-KOH | RCT (Ohm)-H <sub>2</sub> SO <sub>4</sub> |
|------------|---------------|------------------------------------------|
| Ni@MoN-650 | 1.64          | 1.62                                     |
| Ni@MoN-700 | 1.43          | 1.40                                     |
| Ni@MoN-750 | 1.58          | 1.56                                     |
| Ni-700     | 1.71          | 1.65                                     |
| Mo-700     | 1.74          | 1.68                                     |



**Table S3.** Comparison of the catalytic activities of HER on Ni@MoN-700 with recently reported catalysts in the 1.0 mol·L<sup>-1</sup> KOH medium

| Catalyst                | $\eta$ /mV vs. RHE | Ref.      |
|-------------------------|--------------------|-----------|
| Ni@MoN-700              | 30                 | This work |
| Ni/NiO-cp               | 124                | [2]       |
| W-MoP                   | 71                 | [7]       |
| Mo-N/Mo-C               | 135                | [8]       |
| Mo-N/C@MoS <sub>2</sub> | 117                | [9]       |
| MoS <sub>2</sub> /MoN   | 132                | [10]      |
| NiSA-MoS <sub>2</sub>   | 98                 | [17]      |
| Ni <sub>3</sub> N       | 74                 | [24]      |
| NiO/Ni-CNT              | 80                 | [25]      |
| NiCoDPA                 | 112                | [41]      |

Note:  $\eta$  is the overpotential measured at 10 mA·cm<sup>-2</sup>

**Table S4.** Comparison of the catalytic activities of HER on Ni@MoN-700 with recently reported catalysts in the 0.5 mol·L<sup>-1</sup> H<sub>2</sub>SO<sub>4</sub> medium

| Catalyst                           | $\eta$ /mV vs. RHE | Ref.      |
|------------------------------------|--------------------|-----------|
| Ni@MoN-700                         | 76                 | This work |
| Co-N-V <sub>3</sub> S <sub>4</sub> | 268                | [1]       |
| MoS <sub>2</sub> /MoN              | 117                | [10]      |
| VN/Mo <sub>2</sub> C               | 140                | [15]      |
| NiSA-MoS <sub>2</sub>              | 110                | [17]      |
| PCN@MoS <sub>2</sub> @C            | 130                | [19]      |
| Cu electrode                       | 182                | [39]      |
| CoP <sub>3</sub> /CoMoP            | 125                | [40]      |
| CoMoOF/GF                          | 94                 | [42]      |

Note:  $\eta$  is the overpotential measured at 10 mA·cm<sup>-2</sup>.
